# Supplementary material
Source: Springer Nature journal article supplement (https://www.springermedizin.de/resource/supplementary/12961_2009_96_MOESM3_ESM.pdf/9571406)

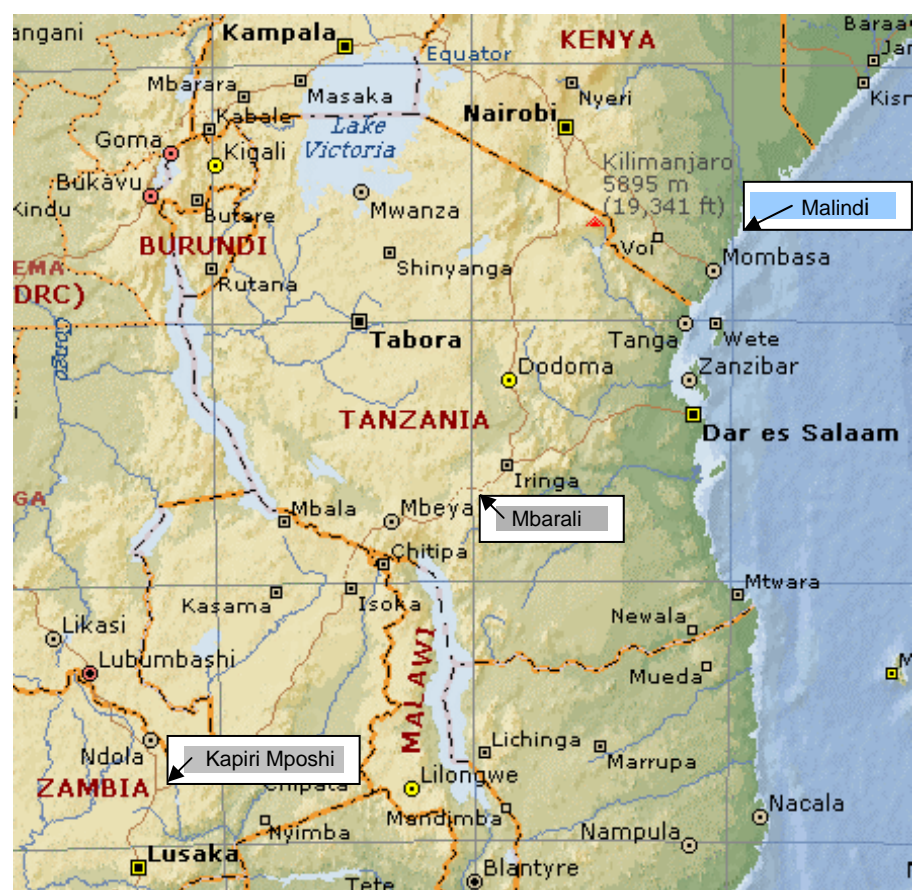

Supplement: MOESM3 [file 9571406]
